# Supplementary material
Source: PubMed Central journal article supplement (PMC7437084)
Supplement: sj-pdf-1-ueg-10.1177_2050640620924302.pdf [file sj-pdf-1-ueg-10.1177_2050640620924302.pdf]

| <b>Supplementary Table 1: Definitions of terms used in the study</b> |                                                                                                                                                                                                                                                          |
|----------------------------------------------------------------------|----------------------------------------------------------------------------------------------------------------------------------------------------------------------------------------------------------------------------------------------------------|
| <b>Focal enlargement</b>                                             | <i>area of the pancreatic parenchyma with a different density compared with that of the surrounding tissue.</i>                                                                                                                                          |
| <b>Diffuse enlargement</b>                                           | <i>swelling of the pancreas in the absence of a discrete mass</i>                                                                                                                                                                                        |
| <b>Other Organ Involvement (OOI)</b>                                 | <i>presence of extra-pancreatic organ involvement, such as biliary tract, retroperitoneum, kidney, and salivary/ lacrimal glands</i>                                                                                                                     |
| <b>Remission</b>                                                     | <i>disappearance of clinical symptoms, and resolution of the pancreatic and/or extrapancreatic manifestations on imaging studies</i>                                                                                                                     |
| <b>Relapse</b>                                                       | <i>recurrence of symptoms with the development/reappearance of pancreatic and/or extrapancreatic abnormalities on imaging studies</i>                                                                                                                    |
| <b>Tapering</b>                                                      | <i>progressive reduction of steroid dosage after induction therapy</i>                                                                                                                                                                                   |
| <b>Timing of diabetes mellitus development</b>                       | <i>in patients with diabetes mellitus, the timing of initial glucose intolerance and its relationship with the diagnosis of AIP was evaluated</i>                                                                                                        |
| <b>Steroid trial</b>                                                 | <i>the trial had a diagnostic purpose. It was considered positive if a rapid (2 weeks) radiologically demonstrable resolution or marked improvement in pancreatic/extrapancreatic manifestations after 0.6-1 mg/kg/day of prednisolone were observed</i> |

**Supplementary Table 2: Features found at diagnostic imaging**

|                        |                                       |                         | <b>Overall<br/>(n=173)</b> | <b>Type 1 AIP<sup>§</sup><br/>(n=106)</b> | <b>Type 2 AIP<sup>§</sup><br/>(n=48)</b> | <b>NOS<sup>°</sup>-AIP<sup>§</sup><br/>(n=19)</b> | <b>Type1 vs<br/>Type2</b> |
|------------------------|---------------------------------------|-------------------------|----------------------------|-------------------------------------------|------------------------------------------|---------------------------------------------------|---------------------------|
| <b>Ultrasonography</b> |                                       |                         | <b>115 (66.5)</b>          | <b>69 (65.1)</b>                          | <b>29 (60.4)</b>                         | <b>17 (89.5)</b>                                  | <b>0.58</b>               |
|                        | Hypoechoic pancreatic enlargement     |                         | 99 (86.1)                  | 59 (85.5)                                 | 25 (86.2)                                | 15 (88.2)                                         | 0.92                      |
|                        |                                       | <i>Focal</i>            | 71 (61.7)                  | 40 (58)                                   | 19 (65.5)                                | 12 (70.6)                                         | 0.43                      |
|                        |                                       | <i>Diffuse</i>          | 28 (24.3)                  | 19 (27.5)                                 | 6 (20.7)                                 | 3 (17.6)                                          | 0.42                      |
|                        | Main pancreatic duct dilatation       |                         | 15 (13.0)                  | 11 (15.9)                                 | 3 (10.3)                                 | 1 (5.9)                                           | 0.47                      |
| <b>CT* scan</b>        |                                       |                         | <b>145 (83.8)</b>          | <b>93 (87.7)</b>                          | <b>36 (75.0)</b>                         | <b>16 (84.2)</b>                                  | <b>0.05</b>               |
|                        | Pancreatic enlargement                |                         | 124 (85.5)                 | 80 (86.0)                                 | 29 (80.6)                                | 15 (93.7)                                         | 0.45                      |
|                        |                                       | <i>Focal</i>            | 86 (67.7)                  | 51 (63.7)                                 | 23 (79.3)                                | 12 (80.0)                                         | 0.12                      |
|                        |                                       | <i>Diffuse</i>          | 38 (30.7)                  | 29 (36.3)                                 | 6 (20.7)                                 | 3 (20.0)                                          | 0.12                      |
|                        | Main pancreatic duct dilatation       |                         | 23 (15.9)                  | 12 (12.9)                                 | 5 (13.9)                                 | 6 (37.5)                                          | 0.88                      |
|                        | Capsule-like rim                      |                         | 20 (13.8)                  | 10 (10.7)                                 | 6 (16.7)                                 | 4 (25.0)                                          | 0.35                      |
|                        | Contrast enhancement of pancreas      |                         | 20 (13.8)                  | 15 (16.1)                                 | 4 (11.1)                                 | 1 (6.2)                                           | 0.47                      |
|                        | Cystic lesions                        |                         | 6 (4.1)                    | 4 (4.3)                                   | 2 (5.6)                                  | 0                                                 | 0.75                      |
| <b>MRI<sup>#</sup></b> |                                       |                         | <b>108 (62.4)</b>          | <b>67 (63.2)</b>                          | <b>31 (64.6)</b>                         | <b>10 (52.6)</b>                                  | <b>0.86</b>               |
|                        | Pancreatic enlargement                |                         | 93 (86.1)                  | 57 (85.1)                                 | 26 (83.9)                                | 10 (100.0)                                        | 0.88                      |
|                        |                                       | <i>Focal</i>            | 56 (60.2)                  | 29 (50.9)                                 | 19 (73.1)                                | 8 (80.0)                                          | 0.05                      |
|                        |                                       | <i>Diffuse</i>          | 37 (39.8)                  | 28 (49.1)                                 | 7 (26.9)                                 | 2 (20.0)                                          | 0.05                      |
|                        | Main pancreatic duct stenosis         |                         | 17 (15.7)                  | 13 (19.4)                                 | 2 (6.4)                                  | 2 (20.0)                                          | 0.09                      |
|                        | Main pancreatic duct dilatation       |                         | 16 (14.8)                  | 9 (13.4)                                  | 4 (12.9)                                 | 3 (30.0)                                          | 0.95                      |
|                        | Capsule-like rim                      |                         | 14 (13.0)                  | 9 (13.4)                                  | 2 (6.4)                                  | 3 (30.0)                                          | 0.3                       |
|                        | Contrast enhancement of pancreas      |                         | 14 (13.0)                  | 11 (16.4)                                 | 3 (9.7)                                  | 0                                                 | 0.38                      |
|                        | Cystic lesions                        |                         | 25 (23.1)                  | 14 (20.9)                                 | 8 (25.8)                                 | 3 (30.0)                                          | 0.59                      |
| <b>EUS<sup>°</sup></b> |                                       |                         | <b>118 (68.2)</b>          | <b>75 (70.6)</b>                          | <b>28 (58.3)</b>                         | <b>15 (78.9)</b>                                  | <b>0.13</b>               |
|                        | Hypoechoic pancreatic enlargement     |                         | 106 (89.8)                 | 69 (92.0)                                 | 22 (78.6)                                | 15 (100.0)                                        | 0.06                      |
|                        |                                       | <i>Focal</i>            | 73 (68.9)                  | 45 (65.2)                                 | 15 (68.2)                                | 13 (86.7)                                         | 0.79                      |
|                        |                                       | <i>Diffuse</i>          | 33 (31.1)                  | 24 (34.8)                                 | 7 (31.8)                                 | 2 (13.3)                                          | 0.79                      |
|                        | Hyperechoic Foci                      |                         | 33 (28.0)                  | 22 (29.3)                                 | 7 (25.0)                                 | 4 (26.7)                                          | 0.66                      |
|                        | Lobularity                            |                         | 44 (37.3)                  | 26 (34.7)                                 | 10 (35.7)                                | 8 (53.3)                                          | 0.92                      |
|                        | Main pancreatic duct stenosis         |                         | 11 (9.3)                   | 5 (6.6)                                   | 4 (14.3)                                 | 2 (13.3)                                          | 0.21                      |
|                        |                                       | <i>Single</i>           | 8 (72.7)                   | 3 (60.0)                                  | 4 (100.0)                                | 1 (50.0)                                          | 0.18                      |
|                        |                                       | <i>Multiple</i>         | 3 (27.3)                   | 2 (40.0)                                  | 0                                        | 1 (50.0)                                          | 0.18                      |
|                        | Thickening Wirsung wall               |                         | 20 (16.9)                  | 12 (16.0)                                 | 7 (25.0)                                 | 1 (6.7)                                           | 0.29                      |
|                        | Hyperechoic Wirsung wall              |                         | 12 (10.2)                  | 11 (14.7)                                 | 1 (3.6)                                  | 0                                                 | 0.12                      |
|                        | Thickening common bile duct wall >2mm |                         | 27 (22.9)                  | 17 (22.7)                                 | 5 (17.9)                                 | 5 (33.3)                                          | 0.6                       |
|                        |                                       | <i>Focal</i>            | 15 (55.6)                  | 8 (47.1)                                  | 4 (80.0)                                 | 3 (60.0)                                          | 0.20                      |
|                        |                                       | <i>Diffuse</i>          | 12 (44.4)                  | 9 (52.9)                                  | 1 (20.0)                                 | 2 (40.0)                                          | 0.20                      |
|                        | Cystic lesions                        |                         | 5 (4.2)                    | 2 (2.7)                                   | 1 (3.6)                                  | 2 (13.3)                                          | 0.81                      |
|                        | CE-EUS <sup>°</sup>                   |                         | 32 (27.1)                  | 25 (33.3)                                 | 5 (17.9)                                 | 2 (13.3)                                          | 0.13                      |
|                        |                                       | <i>Hypoenhancement</i>  | 6 (18.7)                   | 4 (16.0)                                  | 2 (40.0)                                 | 0                                                 | 0.23                      |
|                        |                                       | <i>Isoenhancement</i>   | 14 (43.7)                  | 12 (48.0)                                 | 2 (40.0)                                 | 0                                                 | 0.75                      |
|                        |                                       | <i>Hyperenhancement</i> | 12 (37.5)                  | 9 (36.0)                                  | 1 (20.0)                                 | 2 (100.0)                                         | 0.49                      |

<sup>§</sup>AIP: Autoimmune pancreatitis; <sup>°</sup>NOS: Not Otherwise Specified; \*CT: Computed Tomography; <sup>#</sup>MRI: Magnetic Resonance Imaging; <sup>°</sup>(CE)EUS: (Contrast Enhanced) Endoscopic Ultrasound; <sup>‡</sup>ERCP: Endoscopic Retrograde Cholangiopancreatography

**Supplementary Table 3:** IgG4 values in the entire cohort of patients, and in AIP1 and AIP2 subgroups

|                               | <b>Absolute median value (mg/dL)</b> | <b>N° of patients with IgG4 value above UNR* (n)</b> | <b>N° of patients with IgG4 value two times above UNR* (n)</b> | <b>Difference in IgG4 absolute median value AIP1 vs AIP2</b> |
|-------------------------------|--------------------------------------|------------------------------------------------------|----------------------------------------------------------------|--------------------------------------------------------------|
| <b>Overall</b>                | 177.5<br>(IQR° 70-402)               | 78/140                                               | 46/140                                                         |                                                              |
| <b>Type 1 AIP<sup>§</sup></b> | 234<br>(IQR° 133-567)                | 62/84                                                | 40/84                                                          | <i>p= 0.03</i>                                               |
| <b>Type 2 AIP<sup>§</sup></b> | 87<br>(IQR° 25-161)                  | 11/40                                                | 5/40                                                           |                                                              |

<sup>§</sup>AIP: Autoimmune pancreatitis; °IQR: Interquartile Range; \*UNR: Upper Normal Range
